# 1 NON-INVASIVE REAL-TIME ACCESS TO THE OUTPUT OF THE 2 SPINAL CORD VIA A WRIST WEARABLE INTERFACE

3  
4 Irene Mendez<sup>1</sup>, Deren Y. Barsakcioglu<sup>1</sup>, Ivan Vujaklija<sup>2</sup>, Daniel Z. Wetmore<sup>3</sup>, Dario Farina<sup>1\*</sup>

5  
6 <sup>1</sup> Department of Bioengineering, Imperial College London, London, UK.

7 <sup>2</sup> Department of Electrical Engineering and Automation, Aalto University, Espoo, Finland.

8 <sup>3</sup> Facebook Reality Labs, New York, NY, USA.

9 \* Corresponding author. Email: [d.farina@imperial.ac.uk](mailto:d.farina@imperial.ac.uk)

10

11

## 12 ABSTRACT

13 Despite the promising features of neural interfaces, their trade-off between information transfer  
14 and invasiveness has limited translation and viability outside research settings. Here, we present  
15 a non-invasive neural interface that provides access to spinal motoneuron activities from a sensor  
16 band at the wrist. The interface decodes electric signals present at the tendon endings of the  
17 forearm muscles by using a model of signal generation and deconvolution. First, we evaluated  
18 the reliability of the interface to detect motoneuron firings, and thereafter we used the decoded  
19 neural activity for the prediction of finger movements in offline and real-time conditions. The  
20 results showed that motoneuron activity decoded from the wrist accurately predicted individual  
21 and combined finger commands and therefore allowed for highly accurate real-time control.  
22 These findings demonstrate the feasibility of a wearable, non-invasive, neural interface at the  
23 wrist for precise real-time control based on the output of the spinal cord.

24

## 25 INTRODUCTION

26 In our ever-growing digital world, human-machine interaction has a pivotal role not only in  
27 defining our relationship with technology but also in determining its usability and effectiveness.  
28 However, current user input systems, such as keyboards or touchscreens, are constrained by the  
29 possibilities of the physical world to capture and deliver users' intentions. Bypassing these  
30 intermediary devices would revolutionize our interaction with technology, making control more  
31 intuitive and human centered. Neural interfaces offer a direct decoding of a user's intentions  
32 from the nervous system and thus may enable an intuitive interaction with the environment by  
33 translating neural activity into digital inputs to external devices. This approach targets the neural  
34 code of motor commands to provide seamless and enhanced control of external systems.

35

36 Traditionally, signals from the brain have been leveraged to control prostheses(1),  
37 wheelchairs(2), and exoskeletons(3), among other systems(4, 5). Nonetheless, direct brain  
38 interfaces are currently constrained by a trade-off between their information transfer and  
39 invasiveness, with non-invasive systems providing substantially smaller information bandwidth  
40 than invasive devices(6). Furthermore, acceptance of brain interfaces for daily use outside  
41 rehabilitation applications remains uncertain. In comparison, the peripheral nervous system  
42 offers a more accessible window to motor volition(7). Motoneurons in the spinal cord translate  
43 the synaptic inputs they receive from supraspinal centers and peripheral afferents into a neural  
44 output sent to the muscles(8). The axonal action potentials generated by motoneurons reach the  
45 neuromuscular junctions to excite muscle fibers. This generates muscle fiber action potentials

46 that propagate from the neuromuscular junctions to the tendon endings(9), generating electric  
47 fields detectable on the skin via surface electrodes(10). When detected over active muscles, this  
48 electrical activity is the electromyographic (EMG) signal, which has been extensively used as  
49 input for neuroprostheses(11).

50  
51 The most common approach to human-machine interfacing for decoding distal movements of the  
52 upper limb is to record EMG from forearm muscles, yet the least obtrusive and most socially  
53 acceptable location for long-term adoption of wearable devices is at the wrist due to social  
54 acceptance of wristwatches(12, 13). Tendon tissues are dominant at the wrist, and there is  
55 minimal muscle mass at the end of several forearm muscles (Fig. 1). Nonetheless, electric fields  
56 generated by neural activation can still be detected at the tendons due to volume conduction (Fig.  
57 1). Hereafter, we will refer to signals recorded over tendon tissue as tendon electric signals.

58  
59 A few studies have recorded the electrical activity at the wrist to decode motor intention(14–16),  
60 but the reported accuracy has been generally low. Using temporal EMG features, Botros et  
61 al.(16) achieved 88% classification accuracy in offline prediction of individual finger tasks and  
62 Jiang et al.(15) obtained 75% in a real-time control task. These accuracies are lower than those  
63 generally reported with classic EMG recordings from the forearm(17, 18). This poor  
64 performance has been explained by the convergence of multiple muscle tendons in a reduced  
65 space, which results in high crosstalk between the signals recorded at the wrist.

66  
67 Estimating activity of spinal motoneurons that indirectly generate the recorded fields is an  
68 alternative approach for recording electric potentials at the wrist achieved by reversing the  
69 generative model of the recorded potentials (Fig. 1). This approach has been developed for  
70 muscle recordings but not for tendon potentials. For muscle signals, the inverse problem is often  
71 solved by blind source separation(19–23). The sparseness of the estimated sources is maximized  
72 under the assumption that the action potentials of the muscle fibers innervated by each  
73 motoneuron are unique with respect to those elicited by other motoneurons. The latter  
74 assumption is satisfied when the number of observations (sensors) is sufficiently large, i.e. in the  
75 range of tens to hundreds(24).

76  
77 The electrical activity recorded over tendon tissue can also theoretically be separated into  
78 contributions of individual neural sources. Each motoneuron discharge generates an electric field  
79 transmitted through the tendon tissue that can be distinguished from the fields generated by other  
80 motoneurons. The biophysical properties of electric potentials recorded over tendon tissues are  
81 known (25–28), but these signals have not previously been used to identify individual  
82 motoneuron discharges.

83  
84 Here we propose an innovative interface that decodes spinal motoneuron discharges from tendon  
85 electric signals at the wrist to develop a non-invasive, unobtrusive, and socially acceptable  
86 wearable. The scientific rationale of the approach is that the end-of-fiber components of the  
87 muscle fiber action potentials that produce the tendon electric fields have the same timing (with a  
88 constant delay of a few ms) as the axonal action potentials from the spinal cord(29). Therefore,  
89 we recorded tendon electric signals with modular and flexible electrode arrays that adapt to the  
90 users' body(30). This compact design can also be paired with highly embedded systems and  
91 wireless communication to develop wearable recording devices(31). Here we demonstrate that

92 the decoded tendon signals from these recordings indeed correspond to individual spinal  
93 motoneuron discharges, and that this neural decoding enhances the information transfer to  
94 accurately predict individual and combined finger movements in offline and real-time control  
95 conditions. With this demonstration, we present a new high-fidelity, non-invasive, unobtrusive,  
96 and socially acceptable wearable neural interface at the wrist as a viable alternative to invasive  
97 neural recordings or traditional muscle interfaces.

98

## 99 **RESULTS**

100 To validate the wrist-wearable neural interface, we investigated the physiological properties of  
101 the decoded tendon electrical signals, and then assessed their potential for offline and real-time  
102 prediction of finger tasks. In experimental sessions, nine participants performed isometric  
103 contractions of individual fingers as well as of the combinations of thumb, index, and middle  
104 fingers at 15% and 30% of maximal force. During the tasks, high-density electrode arrays were  
105 placed around the circumference of the wrist (at least 100 channels arranged in rows of 5  
106 electrodes; Fig. 2) to record tendon electric signals. Supplementary Fig. 1 shows the spatial  
107 distribution of the average activity recorded at the tendon for each finger flexion and subject. In  
108 addition, high-density electrode arrays were mounted along the circumference of the forearm  
109 (not shown in Fig. 2, see Supplementary Fig. 2) to validate the neural nature of the decoded  
110 tendon electrical activity (see Methods).

### 111 **Physiological analysis**

112 The tendon electric signals were decomposed into a series of discharge timings (decoded tendon  
113 electric signals) by a convolutive blind source separation algorithm (see Methods). A  
114 representative contraction with the force profile, one tendon electric signal, and the  
115 corresponding decoded activity are depicted in Fig. 2.c. Once the tendon signals have been  
116 decoded, the spatial representation of the electric potentials can be recovered by spike-triggered  
117 averaging the tendon electric signals over time intervals centered at the detected discharge times  
118 (see Methods). Fig. 2.d shows representative 2D amplitude maps of tendon electric signals and  
119 three examples of the electric potentials generated by single motoneurons and volume  
120 conduction. The distributions of electric potentials recovered from the wrist are unique for each  
121 motoneuron, with high synchronization in their peak amplitude times due to the end-of-fiber  
122 nature of these electrical activities.

123 On average,  $6 \pm 3$  motoneurons were identified by source separation of the tendon electric fields  
124 per finger contraction at each force level. To ensure that this decoded tendon electrical activity  
125 indeed represented the neural output from the spinal cord, the discharge timings of the decoded  
126 tendon electric signals were used to trigger an average of the EMG signals concurrently recorded  
127 at the forearm (see Methods and Supplementary Fig. 2). The rationale for this processing is that  
128 if the discharge times decoded at the wrist correspond to the times of activation of spinal  
129 motoneurons, then the triggered average should identify muscle fiber potentials at the forearm  
130 above the baseline noise. Indeed, motoneuron activity determines muscle fiber activity  
131 synchronous with the motoneuron firings. Therefore, if the decoded times of activation from the  
132 wrist determine action potentials of muscle fibers at the forearm when used as triggers, they must  
133 correspond to discharge patterns of motoneurons. This approach provided a means for robustly  
134 validating the wrist neural interface. The action potentials at the forearm obtained by spike-  
135 triggered average were considered above the baseline noise if their peak amplitude was greater  
136 than four times the noise level, as commonly assumed in spike sorting(32) (see Methods and

137 Supplementary Fig. 2). From the total population of 970 detected motoneurons at the wrist, 703  
138 (72.47%) resulted in detectable action potentials at the forearm. This is an extremely high  
139 proportion, considering that motoneurons detected at the wrist may innervate muscle fibers deep  
140 into the muscle which therefore would not produce sufficiently large action potentials at the  
141 forearm skin surface. This result indicated that the timings of activation decoded from the tendon  
142 electric fields indeed correspond to neural activity from the output layer of the spinal cord. This  
143 demonstrates that a peripheral recording from the skin overlying tendon tissue can be decoded  
144 into the ultimate neural code of movement.

145 The quality of the decoding of tendon electric fields was further validated with a measure of  
146 pulse-to-noise ratio(33) (PNR) of the estimated discharge activation patterns. The PNR is an  
147 estimate of the mean square error of the motoneuron spike detection that measures the ratio  
148 between the mean energy of the spikes at the discharge times and the baseline of the signal(33).  
149 At both force levels, the PNR was greater than 30 dB and generally higher than usually observed  
150 when decoding classic EMG recordings from the forearm(34–37) ( $38.9 \pm 2.3$  dB and  $39.6 \pm 3.0$   
151 dB for 15% and 30% force efforts, respectively) (Fig. 2.e). These levels of PNR correspond to an  
152 accuracy in detection of spikes in the estimated sources with >90% sensitivity and < 2% false  
153 alarm rate(33).

154 After validating the decoding procedures, we further analyzed the properties of the decoded  
155 discharge patterns to verify whether they were consistent with known physiological properties.  
156 We extracted the average discharge rate of each identified motoneuron as well as the coefficient  
157 of variation of the estimated inter-spike intervals (ratio between the standard deviation and mean  
158 of the inter spike intervals expressed as a percentage). The estimated motoneuron discharge rates  
159 were within the physiological range of 5-25 Hz(38, 39) at both force levels ( $12.23 \pm 1.58$  Hz and  
160  $12.90 \pm 2.14$  Hz at 15% and 30% force efforts, respectively) (Fig. 2.e), being significantly higher  
161 at 30% than at 15% force effort ( $F_{1,8} = 12.879$ ,  $p = 0.007$ ), in agreement with motoneuron's rate  
162 coding in force production(9). The coefficient of variation of the estimated inter spike intervals  
163 was  $23.51 \pm 3.63\%$  and  $24.47 \pm 4.01\%$ , for 15% and 30% force efforts, respectively (Fig. 2.e),  
164 which is within known physiological values(40).

165 The analysis of accuracy via spike-triggered average and PNR, as well as the physiological  
166 analysis of motoneuron behavior demonstrated the validity and accuracy of the proposed  
167 decoding technique. Overall, these results prove the accurate identification of the activity of  
168 individual spinal motoneurons through non-invasive wearable recordings overlying the tendon  
169 endings at the wrist. After confirming validity and accuracy, we established a human-machine  
170 interface based on the proposed neural decoding approach.

### 171 **User intent prediction (offline)**

172 The decoded motoneuron activity was used to classify finger movements (Fig. 3). As a reference,  
173 we compared the classification from motoneurons with that obtained using the tendon electric  
174 signals before decoding. Relevant features for pattern recognition (see Methods) were extracted  
175 from the motoneurons and tendon electric signals and were fed into independent neural networks  
176 for classification. In a first scenario, the neural network was trained with the steady contraction  
177 part of all finger tasks and rest (10 classes in total) at either 15% or 30% force effort following a  
178 ten-fold cross validation approach (see Methods and Fig. 3). Figure 3 shows the resulting  
179 classification accuracy, which was significantly higher for the decoded motoneurons than for the  
180 un-decoded tendon electric signals at both 15% ( $96.93 \pm 2.09\%$  vs  $81.23 \pm 10.04\%$ ;  $F_{1,8} =$

181 23.379,  $p = 0.001$ ) and 30% force efforts ( $97.60 \pm 1.75\%$  vs  $85.62 \pm 6.86\%$ ;  $F_{1,8} = 31.036$ ,  $p =$   
182 0.001). In addition, the effect of force was only significant for the tendon electric signals,  
183 yielding in higher classification accuracy at the highest force effort ( $F_{1,8} = 8.026$ ,  $p = 0.022$ ).

184 To simulate more realistic control conditions with variable force levels, the classification  
185 accuracy was also calculated after training and testing with finger contractions from both force  
186 levels combined following a ten-fold cross validation (see Methods and Fig. 3). The gain in  
187 classification accuracy when decoding the tendon signals was even greater in this condition  
188 ( $95.65 \pm 2.76\%$  vs  $69.04 \pm 10.61\%$  for decoded and un-decoded tendon signals,  $F_{1,8} = 64.606$ ,  $p$   
189  $< 0.001$ ). The results obtained without decoding the neural activity were consistent with those  
190 reported in previous studies(15) and indicate poor classification performance. Conversely, the  
191 proposed neural decoding allowed for  $>95\%$  accuracy over ten finger tasks at multiple force  
192 levels, which was substantially greater than without decoding the tendon signals as well as than  
193 conventional EMG-based interfaces(16, 17, 41).

194 Overall, the motoneuron activation patterns identified from the wrist provided a highly accurate  
195 prediction of finger tasks.

### 196 **Real-time control**

197 We then implemented the decoding and classification in real-time and tested the resultant  
198 interface in an online control task on four participants. As for the offline analysis, we compared  
199 the real-time control results with the control achieved without decoding the tendon electric  
200 signals. Figure 4a shows the processing pipeline. Three repetitions of rest, plus each individual  
201 finger contraction, and all combinations of thumb, index, and middle (10 tasks in total) were  
202 recorded to train a neural network using the same signal features as for the offline analysis (see  
203 Methods and Supplementary Fig. 3). The training set was also used to calibrate the decoding  
204 parameters to be thereafter applied in real time to extract the corresponding motoneuron activity  
205 (see Methods). The motoneuron decoding and the classification were then applied online and  
206 used for control of finger tasks. Figure 4b shows the decoded signals obtained during this process  
207 from one representative participant. On average,  $78 \pm 8$  motoneurons were identified across all  
208 tasks for each participant. During the online tests, 4 targets per class (40 in total) were presented  
209 to the participants in randomized order. The participants were given 5 s to attempt each target  
210 with a success condition of maintaining the correct gesture for 500 ms (Fig. 4c). The mean  
211 completion rate resulted significantly higher for the motoneuron ( $93.12 \pm 2.39\%$ ) than for the  
212 un-decoded tendon electric signals ( $56.87 \pm 18.41\%$ ), while maintaining similar completion  
213 times ( $1.81 \pm 0.89$  s vs  $1.65 \pm 0.82$  s).

214 The poor online control capacity when using tendon electric signals from the wrist without  
215 decoding is in agreement with previous work(15) and indicates the poor discrimination power of  
216 mixtures of electric fields activated by motoneurons. Conversely, the control using separated  
217 motoneuron activation patterns was extremely accurate and provided large information transfer  
218 (10 classes,  $\sim 93\%$  successful task completions).

### 219 220 **DISCUSSION**

221 We have demonstrated that the neural information sent from the spinal cord to muscles can be  
222 accurately decoded at the single motoneuron level with a wearable technology mounted at the  
223 wrist. This technology allowed for the accurate real-time control of 10 commands elicited by  
224 finger tasks. Thus, we have designed a unique neural interface with high information transfer

225 rate. The presented results show the potential of future portable, battery-operated systems worn  
226 at the wrist as un-obtrusive and viable neural interfaces to use in daily living.

227  
228 The neural origin of the decoded tendon signals was proven by retracing the muscle fiber action  
229 potentials from concurrent recordings from the forearm via spike-triggered averaging  
230 (Supplementary Fig. 2). This approach showed that the majority of the sources identified at the  
231 wrist coincided with action potentials at the forearm muscle fibers which were well above the  
232 baseline noise. This result demonstrates the neural origin of the decoded activity. Indeed, if the  
233 decoded activity were not generated by motoneurons, spike-triggered averaging on muscle  
234 electrical signals would yield only noise as it would be equivalent to average uncorrelated EMG  
235 signals at the forearm. The observation that approximately 30% of the decoded motoneurons did  
236 not result in averaged potentials above the noise level is explained by the location of the muscle  
237 fibers innervated by the detected motoneurons. For instance, the flexor digitorum superficialis,  
238 the flexor digitorum profundus, and the flexor pollicis longus are located deep in the forearm and  
239 therefore their innervating motoneurons generate electric potentials detectable at the wrist that  
240 may not be at the forearm. Interestingly, this indicates that the limitations of EMG recordings to  
241 superficial muscles may be surpassed by tendon recordings when multiple muscles converge into  
242 a common tendon area, such as at the wrist. In addition to proving the neural origin of the  
243 decoded activity by spike-triggered averaging, we also computed the pulse-to-noise ratio (known  
244 estimate of the mean square error(33)), coefficient of variation of the inter spike intervals  
245 (associated to the likelihood of erroneously detected action potentials(40)), and action potential  
246 discharge rate (used as a physiological indicator(38, 39)). All metrics were well within the  
247 expected accuracy and physiological standards, showing that the decoded tendon electric signals  
248 were reliably extracted and corresponded to the neural output from the spinal cord (Fig. 1).

249  
250 The number of identified motoneurons (6 motoneurons per finger contraction at both force  
251 efforts) was consistent with the results by Stachaczyk et al.(42) who identified between 5-8  
252 motoneurons per finger contraction when recording signals from the forearm flexor muscles.  
253 Interestingly, however, the pulse-to-noise ratio levels observed at the wrist in this study were  
254 greater than those usually reported for forearm recordings. Moreover, as discussed above, the  
255 decoding from the wrist was not biased towards detecting superficial muscles since the effect of  
256 the volume conductor at the wrist is less than at the forearm. Furthermore, the signal  
257 characteristics at the wrist are different than that at the belly of the muscle. The electric  
258 potentials recorded at the wrist are end-of-fiber components(25), which are non-propagating  
259 potentials highly synchronized across channels (as shown in Fig. 2d) and shorter in time than the  
260 propagating signals recorded from muscles(43). These characteristics result in greater temporal  
261 sparsity at the tendons because of the shorter duration of the individual potentials. Therefore, the  
262 raw tendon signals can be modelled as convolutive mixtures in which the filters applied to the  
263 sources have relatively short duration (see Methods). Short duration filters are easier to  
264 compensate since they better approximate delta functions that represent the sources. This also  
265 results in sparser observations. Overall, we have not only shown that electrical potentials  
266 recorded from tendon tissue can be decoded into neural activity but also that recording from the  
267 wrist may even be preferable over conventional muscle recordings in term of representativeness  
268 of the decoded information and accuracy.

269

270 From the decoded signals, we performed an offline classification with the aim of using the wrist  
271 interface for control applications. Results showed that the decoded signals accurately predicted  
272 finger tasks for up to 10 classes with significantly higher accuracy than the tendon electric  
273 signals without decoding. The classification accuracy for the un-decoded tendon electric signals  
274 (~83%) was slightly higher than the one obtained by Jiang et al.(15) in a real-time gesture  
275 prediction task (~75%). Although only four sensors were used in that previous study, their  
276 location was consistent with our electrode placement below the head of the ulna. In contrast,  
277 Botros et al.(16) reported higher accuracies (~88%) for offline single and combined finger  
278 prediction using the same feature set, but their electrodes targeted the muscle fibers in the  
279 proximal and medial part of the wrist instead of the tendons. The main limitation of the tendon  
280 electric signals is their high crosstalk due to the convergence of the muscle tendons in a reduced  
281 space. This contributes to the high overlap between the classes in the spatial activity maps  
282 (Supplementary Fig. 1) and feature space (Supplementary Fig. 3) of the tendon electrical signals,  
283 which resulted in an overall lower performance than the decoded signals. In contrast, previous  
284 studies by Dai and Hu showed that myoelectric activity spatial maps from the forearm can  
285 indeed differentiate between individual finger flexions(44) and extensions(45) when a large  
286 muscle area is covered. For the flexors, the performance even improved when both myoelectric  
287 and neural spatial maps were used(44).

288  
289 To increase the information transfer and enhance the separability between finger classes despite  
290 the limited area, the tendon electrical signals need to be decoded into the neural output of the  
291 spinal cord. However, no other study has previously addressed the potential of the wrist for non-  
292 invasive neural interfacing, thus the only comparative results are from the forearm. In a finger  
293 prediction task, Stachaczyk et al.(42) obtained similar classification accuracy for the neural  
294 output of the spinal cord at the forearm (98%) to the presented here at the wrist (~97%), although  
295 only for individual finger tasks (the four digits, excluding the thumb, while here we tested  
296 classification over 10 tasks comprising individual and combined finger gestures). Therefore, the  
297 reported accuracy in finger task classification when decoding motoneurons from the wrist is even  
298 superior to that of motoneurons decoded from muscle tissue. Stachaczyk et al.(42) also found  
299 that the neural output was robust to variations in the force level, unlike myoelectric signals from  
300 the forearm when predicting finger flexions(42). Indeed, the increased classification error of  
301 tendon electric signals when both force levels were combined was in agreement with previous  
302 literature on the effect of dynamic contractions in myoelectric pattern recognition(46, 47). These  
303 findings suggest that motoneurons discriminative power between fingers does not rely on spatial  
304 information, nor on force encoding. This is supported by the feature map of the decoded tendon  
305 electric signals presented in Supplementary Fig. 3 where the different classes exhibit higher  
306 separability than in the raw feature space, despite targeting the same area and corresponding to  
307 multiple force levels.

308  
309 Additional real-time experiments were carried out with multiple repetitions to validate and  
310 extend the offline results to real-life interfacing scenarios. This analysis showed that the decoded  
311 tendon electric signals from the wrist can be accurately detected, and enabled real time  
312 interfacing with over 70 motoneurons. Moreover, this neural decoding led to high reproducibility  
313 and separability between finger contractions, as evidenced by the high task completion rate  
314 (>93%) in relatively short time (~1.81s per task). To the best of our knowledge, no other study  
315 has previously implemented a pattern recognition approach with neural decoding in real time.

316 In conclusion, we have shown the feasibility of accurate, non-invasive, real-time, neural  
317 interfacing with wearable sensors mounted at the wrist. These innovative results open an  
318 important perspective in neural interfacing for large scale applications, in medical devices and  
319 consumer electronics applications.

320

## 321 **MATERIALS AND METHODS**

### 322 **Offline experiment**

#### 323 *Experimental setup*

324 Nine healthy participants (4 females, 5 males, ages: 23-31) volunteered in the study. Both  
325 informed consent forms and experimental protocols were approved by Imperial College London  
326 ethics committee in accordance with the Declaration of Helsinki.

327 Two flexible EMG electrode grids (64 channels arranged in 5x13 with 8 mm distance,  
328 GR08MM1305, OT Bioelettronica) were placed along the circumference of the wrist right below  
329 the head of the ulna by visual inspection and physical palpation. In addition, myoelectric signals  
330 were concurrently recorded from the circumference of the thickest part of the forearm using three  
331 EMG electrode grids (64 channels arranged in 8x8 with 10 mm distance, GR10MM0808, OT  
332 Bioelettronica). Both signals were simultaneously acquired by a multi-channel amplifier  
333 (Quattrocento, OT Bioelettronica), bandpass filtered between 10-500 Hz, and sampled at 2048  
334 Hz with 16-bit ADC precision. Individual finger flexion forces were recorded concurrently at 10  
335 Hz with 5 micro load cells (0-5kg CZL635, Phidget), located in an ergonomic and adjustable  
336 platform. The latter was designed to keep the hand supported while in a relaxed position. A  
337 custom program (Matlab 2019b, The MathWorks, Inc) was implemented to synchronously  
338 acquire all the signals.

339 Participants were seated on a chair with their arm supported and the fingers placed in a  
340 comfortable position on top of each force sensor. They were facing a computer screen where  
341 cues and visual feedback of their fingers' flexion forces were provided. The maximum voluntary  
342 force effort across each finger was calibrated for each participant at the beginning of the  
343 experiment. Thereafter, they were instructed to follow the displayed trapezoidal cues (2 s rest, 2 s  
344 ramp up, 5 s steady contraction, 2 s ramp down and 2 s rest) at 15% and 30% of the maximum  
345 force effort for each individual finger and the combinations of thumb-index, thumb-middle,  
346 index-middle and thumb-index-middle in a randomized order (18 trials in total).

347 After the acquisition, tendon and myoelectric signals were digitally band-pass filtered between  
348 20-500 Hz (zero-phase 20<sup>th</sup> order Butterworth) and noisy channels (mostly by electrode overlap  
349 due to the excessive length of the electrode matrices) were discarded. On average  $102 \pm 12$   
350 channels were used for further analysis.

#### 351 *Decoding algorithm*

352 Each axonal action potential of a motoneuron determines the generation of action potentials in  
353 the innervated muscle fibers. Once excited, the muscle fiber undergo depolarization in a confined  
354 portion of their membrane. The depolarization zone, which has a length of 5-10 mm, propagates  
355 along the muscle fibers from the end-plate to the tendons. At the tendons, the depolarization zone  
356 extinguishes, generating a so-called end-of-fiber potential. The electric signals recorded over  
357 tendon regions, therefore, are dominated by the end-of-fiber potentials. Interestingly, each end-  
358 of-fiber potential corresponds to an axonal action potential, such that the activation of



359 motoneurons is reflected by electric fields generated at the tendons. For tendon regions that  
 360 correspond to the convergence of tendon endings of multiple muscles, such as at the wrist, the  
 361 recorded signals are the combination of end-of-fiber potentials from multiple muscles. These  
 362 tendon regions therefore are bio-screens for the multiple pools of motoneurons innervating  
 363 several muscles (Fig. 1), whose coordination generates movements. Interestingly, the end-of-  
 364 fiber potentials have temporal high-frequency components and are less attenuated by the volume  
 365 conductor than muscle propagating potentials(48). These properties make recordings at the  
 366 tendons not only a feasible but also a more suited solution for neural decoding than direct muscle  
 367 recordings (see Discussion).

368 Given the above description of the origin of electric potentials recorded at the tendon regions, the  
 369 following mathematical model holds:

$$\mathbf{x}(k) = \sum_{p=1}^P \sum_{l=0}^{L-1} \mathbf{H}_p(l) \mathbf{s}_p(k-l) + \mathbf{n}(k) \quad (1)$$

370 where  $\mathbf{x}(k)$  are the tendon electric signals at time  $k$  generated by the additive contributions of  $P$   
 371 spinal motoneuron pools innervating different muscles, plus independent noise  $\mathbf{n}(k)$ . The  
 372 activity of individual motoneurons is modelled as trains of delta functions at their corresponding  
 373 discharge timings, convolved by their respective end-of-fiber potentials along their duration  $L$ .  
 374 In equation (1),  $\mathbf{s}_p$  and  $\mathbf{H}_p$  represent the delta trains and end-of-fiber potentials of all the  
 375 motoneurons in the  $p^{th}$  pool, respectively. The high-frequency nature of the end-of-fiber  
 376 components at the tendons corresponds to short temporal durations compared to the propagating  
 377 ones, which translate in relatively low values for  $L$ . In this way, the end-of-fiber potentials ( $\mathbf{H}$ )  
 378 better approximates to the source delta functions than muscle fiber potentials. In addition,  
 379 equation (1) also shows that the high temporal sparsity of the end-of-fiber potentials is also  
 380 reflected in the mixed tendon electric signals ( $\mathbf{x}(k)$ ).

381 Although the previous formulation provides a clear interpretation of the relation between the  
 382 neural and volume conductor elements of the model, it complicates the de-mixing of its  
 383 components. To simplify it, the matrices of the end-of-fiber potentials ( $\mathbf{H}_p$ ) and motoneuron  
 384 firings ( $\mathbf{s}_p$ ) can be rewritten including their corresponding delayed versions along  $L$  to  
 385 compensate for the effect of the convolution. Moreover, tendon electric signals ( $\mathbf{x}(k)$ ) should  
 386 also be extended to an artificial delay proportional to  $L$  and inversely proportional to the number  
 387 of electrodes, to offset the increase of motoneurons to estimate. This yields the following  
 388 equation:

$$\tilde{\mathbf{x}}(k) = \sum_{p=1}^P \tilde{\mathbf{H}}_p \tilde{\mathbf{s}}_p(k) + \tilde{\mathbf{n}}(k) \quad (2)$$

389 where  $\tilde{\cdot}$  indicates the extended variables. Equation (2) reflects the presence of multiple spinal  
 390 motoneuron pools innervating different muscles due to the convergence of their tendon endings  
 391 at the wrist. Nevertheless, their estimation can be conveniently carried out in a single matrix  
 392 form by concatenating the contributions of each pool to the global end-of-fiber potentials ( $\tilde{\mathbf{H}}$ )  
 393 and motoneuron firings ( $\tilde{\mathbf{s}}$ ) as follows:

$$\tilde{\mathbf{H}} = [\tilde{\mathbf{H}}_1, \tilde{\mathbf{H}}_2, \dots, \tilde{\mathbf{H}}_P] \quad (3)$$

$$\tilde{\mathbf{s}}(k) = [\tilde{\mathbf{s}}_1(k), \tilde{\mathbf{s}}_2(k), \dots, \tilde{\mathbf{s}}_p(k)]^T \quad (4)$$

394 Such that:

$$\tilde{\mathbf{x}}(k) = \tilde{\mathbf{H}}\tilde{\mathbf{s}}(k) + \tilde{\mathbf{n}}(k) \quad (5)$$

395 This expression can then be inverted by applying linear-instantaneous blind source separation  
396 while maximizing the sparseness of the sources, as long as the tendon potential generated by  
397 each motoneuron is unique in relation to the potentials generated by other motoneurons. This  
398 condition has been extensively validated for the propagating components of the muscle fiber  
399 action potentials(37, 42, 45, 49), but it has never been tested for the end-of-fiber components  
400 generated at the tendon endings. Therefore, this assumption needed to be confirmed  
401 experimentally (see Results).

402 To validate it, the convolutive blind source separation(22) algorithm was used to invert the end-  
403 of-fiber potentials of the model (finite impulse response filters) and decode the motoneuron  
404 firings from the recorded tendon electric signals. Briefly, convolutive blind source separation  
405 applies an initial whitening and fast fixed-point algorithm that maximizes sparseness(50, 51) to  
406 detect the unique sources (motoneurons), followed by a peak-detection and clustering  
407 postprocessing to identify their corresponding discharge timings in the estimated delta trains(22).  
408 After this process, only the original motoneuron firings (non-delayed versions) were kept for the  
409 rest of the analyses. Finally, for the offline analysis only, the output of this fully automatic  
410 decomposition was validated in a semi-supervised approach that enables the modification of the  
411 thresholds of the local peak detection algorithm to update the filters of poorly detected sources  
412 and recalculate the motoneurons firings(52). Repeatedly detected motoneurons within each  
413 contraction (with > 30% shared spike timings(40)) were removed at this stage.

414 The decomposition output was evaluated in terms of the number of identified motoneurons at the  
415 wrist and the percentage of those that corresponded to electric potentials occurring concurrently  
416 at the forearm. To do so, the fiber potentials at the forearm were calculated by spike-triggered  
417 averaging the forearm signals in 50-ms windows using the discharge times identified from the  
418 wrist as triggers. The average potentials obtained in this way were considered detectable if their  
419 peak amplitude was higher than four times the standard deviation of the baseline noise(32)  
420 computed over the first and last 15ms of the spike triggered average. If one or more channels in  
421 the array met this condition, it was concluded that the corresponding source identified from the  
422 wrist corresponded to the activation of muscle fiber action potentials and thus to the discharges  
423 of a spinal motoneuron.

424 The accuracy of the decoding was assessed based on the pulse-to-noise ratio of the estimated  
425 spike train (mean of the detected spiking activity divided by the mean baseline of the estimated  
426 source expressed in dB(33)). In addition, the coefficient of variation of the inter spike intervals  
427 (ratio between the standard deviation and mean of the inter spike intervals expressed as a  
428 percentage) and motoneurons' discharge rate (ratio between the number of action potentials fired  
429 by a motoneuron and their active period measured in seconds) were computed to evaluate their  
430 physiological properties.

431 A two-way repeated measures ANOVA was used to evaluate differences in the number of  
432 motoneurons, pulse-to-noise ratio, discharge rate, coefficient of variation between force levels  
433 and finger flexions. Statistical significance was set to  $p < 0.05$  and all calculations were  
434 performed in IBM SPSS Statistics 26. Normal distribution of all variables (9 fingers x 2 force

435 levels) was verified by the Shapiro-Wilk test of normality ( $p > 0.05$ ). Few exceptions were found  
436 in 1) the number of motoneurons in the little finger at 15% force effort ( $p = 0.019$ ), 2) the pulse-  
437 to-noise ratio of the thumb at 15% ( $p = 0.037$ ) and index at 30% ( $p = 0.005$ ), and 3) coefficient  
438 of variation of the little at 15% ( $p = 0.006$ ), thumb-index at 15% ( $p = 0.029$ ) and thumb at 30%  
439 ( $p = 0.001$ ). However, this low proportion of non-normal levels was considered acceptable for  
440 the two-way repeated measures ANOVA. The assumption of sphericity was checked for the  
441 finger flexion factor (levels  $> 2$ ) by Mauchly's test and if not satisfied, the Greenhouse-Geisser  
442 correction was applied to the degrees of freedom. Since no two-way interaction between the  
443 factors was found ( $p > 0.05$ ), the main effects of force level and finger flexion were analyzed by  
444 one-way repeated measures ANOVAs. Bonferroni correction was applied for pair-wise  
445 comparisons between finger flexion levels.

#### 446 *Task classification analysis*

447 For the control analysis, motoneurons across contractions were tracked based on the 2D  
448 correlation coefficient between their motoneuron action potential maps. These maps were  
449 calculated by spike-triggered averaging over 25-ms windows of all raw tendon signals at the  
450 wrist electrode array centered at the timings of the motoneurons' spikes(53). The analysis was  
451 carried out only for those channels with significant peak amplitude (i.e. higher than two times the  
452 standard deviation of that motoneuron's peak amplitudes among all channels). Motoneurons  
453 were considered the same if their normalized cross-correlation coefficient exceeded 0.70.

454 Thereafter, the steady contraction part (5s) of each finger flexion was selected and concatenated  
455 along with 5s of rest for feature extraction. Motoneurons firings were windowed in intervals of  
456 120 ms with 40-ms step to compute the spike count of each motoneuron. Raw tendon electric  
457 signals were windowed alike to extract four time-domain features(54) (root mean square, slope  
458 sign changes, zero crossings and waveform length) for each channel. Although multiple features  
459 have been proposed to decode movement intentions from electric signals(16), the selected  
460 feature set is the most common in pattern recognition tasks(55).

461 A multilayer perceptron with one hidden layer and ten hidden neurons(56) was used to classify  
462 the raw and decoded tendon features separately into 10 classes (9 finger flexions plus rest). The  
463 multilayer perceptron was trained using the gradient descent with momentum and adaptive  
464 learning rate backpropagation algorithm. Performance was evaluated in terms of classification  
465 accuracy applying ten-fold cross-validation. In addition, classification accuracy was calculated  
466 for two scenarios: training and testing with contractions from one force level only, and from both  
467 levels combined. In both cases, 2 s of each class were used for training and the remaining data (3  
468 s for the single force dataset, and 8 s for the combined) for testing.

469 In the separate case, a two-way repeated measures ANOVA was used to evaluate differences in  
470 classification accuracy between force levels and data type. Statistical significance was set to  $p <$   
471  $0.05$  and all calculations were performed in IBM SPSS Statistics 26. Normal distribution was  
472 validated by the Shapiro-Wilk test of normality with the only exception of decoded tendon  
473 signals accuracy for 15% force level ( $p = 0.004$ ). When a statistically significant two-way  
474 interaction was found between force levels and data type ( $F_{1,8} = 13.807$ ,  $p = 0.006$ ), the simple  
475 main effects were analyzed with focused one-way repeated measures ANOVA fixing the levels  
476 of the interacting factors. When both force levels were combined during the training and testing,  
477 a one-way ANOVA was used to assess differences in classification accuracy due to the data type  
478 (2 levels). Normal distribution was again ensured by the Shapiro-Wilk test of normality.

## 479 Real-time experiment

480 Four healthy participants (2 females, 2 males, ages: 25-32) participated in the online experiment  
481 (approved by Imperial College London ethics committee in accordance with the Declaration of  
482 Helsinki) after signing informed consent forms.

483 In this case, only tendon electric signals from the wrist were acquired following the same setup  
484 previously described. Participants were comfortably seated in front of a computer screen, with  
485 their right hand resting in a neutral position on top of a table. During training, they were asked to  
486 perform isometric finger contractions against the table at up to a comfortable level following  
487 trapezoidal cues (2 s rest, 2 s ramp up, 5 s steady contraction, 2 s ramp down and 2 s rest). Three  
488 repetitions each individual finger, the combinations of thumb-index, thumb-middle, index-  
489 middle and thumb-index-middle, as well as rest, were recorded in a randomized order (30 trials  
490 in total).

491 To extract motoneurons' firings in real-time, we implemented a dual phase blind source  
492 separation(23). In the first calibrating phase, the algorithm followed the same procedure  
493 described above to identify the latent motoneurons. Then, the obtained inverse of the end-of-  
494 fiber potential filters was applied to new tendon electric signals epochs to decompose the activity  
495 of the previously identified motoneurons, and detect new action potentials using the stored spike  
496 and noise centroids of each source(23). During calibration, motoneurons with more than 20% of  
497 shared spikes were considered equal and only the one with highest pulse-to-noise ratio was  
498 preserved to avoid redundant activity. In this case the training set was used to calibrate the  
499 decomposition parameters for its later implementation in real-time during the control task. As in  
500 the previous experiment, the spike count of each motoneuron was calculated over sliding  
501 windows of 120 ms with 40 ms step (coinciding with the update rate of the system). On the other  
502 hand, the root mean square, slope sign changes, zero crossings and waveform length were  
503 extracted for the raw tendon electric signals using the same windowing process.

504 Two multilayer perceptron with one hidden layer and ten hidden neurons(56) were used to  
505 classify the decoded and raw tendon features separately into 10 classes (9 finger flexions plus  
506 rest). They were trained using gradient descent with momentum and adaptive learning rate  
507 backpropagation over the steady part of the contraction. Both multilayer perceptrons were tested  
508 separately in a real-time task with 4 targets of each class (40 targets in total). Participants were  
509 given 5 s to attempt each target, with a required hold time of 500 ms to consider the target  
510 successfully reached. Performance was measured in terms of completion rate (number of  
511 successful targets divided by the total number of targets, expressed as a percentage) and  
512 completion time (time needed to successfully achieve a target).

513

## 514 REFERENCES

515

- 516 1. M. Velliste, S. Perel, M. C. Spalding, A. S. Whitford, A. B. Schwartz, Cortical control of  
517 a prosthetic arm for self-feeding. *Nature*. **453**, 1098–1101 (2008).
- 518 2. X. Deng, Z. L. Yu, C. Lin, Z. Gu, Y. Li, A Bayesian Shared Control Approach for  
519 Wheelchair Robot with Brain Machine Interface. *IEEE Trans. Neural Syst. Rehabil. Eng.*  
520 **28**, 328–338 (2020).
- 521 3. A. L. Benabid, T. Costecalde, A. Eliseyev, G. Charvet, A. Verney, S. Karakas, M.  
522 Foerster, A. Lambert, B. Morinière, N. Abroug, M. C. Schaeffer, A. Moly, F. Sauter-  
523 Starace, D. Ratel, C. Moro, N. Torres-Martinez, L. Langar, M. Oddoux, M. Polosan, S.

- 524 Pezzani, V. Auboiroux, T. Aksenova, C. Mestais, S. Chabardes, An exoskeleton  
525 controlled by an epidural wireless brain–machine interface in a tetraplegic patient: a  
526 proof-of-concept demonstration. *Lancet Neurol.* **18**, 1112–1122 (2019).
- 527 4. K. A. Moxon, G. Foffani, Brain-machine interfaces beyond neuroprosthetics. *Neuron.* **86**  
528 (2015), pp. 55–67.
- 529 5. M. M. Shanechi, Brain–machine interfaces from motor to mood. *Nat. Neurosci.* **22**, 1554–  
530 1564 (2019).
- 531 6. M. L. Martini, E. K. Oermann, N. L. Opie, F. Panov, T. Oxley, K. Yaeger, Sensor  
532 Modalities for Brain-Computer Interface Technology: A Comprehensive Literature  
533 Review. *Clin. Neurosurg.* **86** (2020), pp. E108–E117.
- 534 7. D. Farina, O. Aszmann, Bionic Limbs: Clinical Reality and Academic Promises. *Sci.*  
535 *Transl. Med.* **6**, 257–12 (2014).
- 536 8. D. Farina, F. Negro, Common Synaptic Input to Motor Neurons, Motor Unit  
537 Synchronization, and Force Control. *Exerc. Sport Sci. Rev.* **43**, 23–33 (2015).
- 538 9. R. M. Enoka, J. Duchateau, in *Surface Electromyography: Physiology, Engineering and*  
539 *Applications* (2016), pp. 1–29.
- 540 10. D. Farina, D. F. Stegeman, R. Merletti, in *Surface Electromyography: Physiology,*  
541 *Engineering and Applications* (2016), pp. 1–24.
- 542 11. D. Farina, Ning Jiang, H. Rehbaum, A. A. A. Holobar, B. Graimann, H. Dietl, O. C.  
543 Aszmann, N. Jiang, H. Rehbaum, A. A. A. Holobar, B. Graimann, H. Dietl, O. C.  
544 Aszmann, The Extraction of Neural Information from the Surface EMG for the Control of  
545 Upper-Limb Prostheses: Emerging Avenues and Challenges. *IEEE Trans. Neural Syst.*  
546 *Rehabil. Eng.* **22**, 797–809 (2014).
- 547 12. Y.-M. Fang, C.-C. Chang, Users’ psychological perception and perceived readability of  
548 wearable devices for elderly people. *Behav. Inf. Technol.* **35**, 225–232 (2016).
- 549 13. R. Raisamo, I. Rakkolainen, P. Majoranta, K. Salminen, J. Rantala, A. Farooq, Human  
550 augmentation: Past, present and future. *Int. J. Hum. Comput. Stud.* **131**, 131–143 (2019).
- 551 14. X. Jiang, L. K. Merhi, Z. G. Xiao, C. Menon, Exploration of Force Myography and  
552 surface Electromyography in hand gesture classification. *Med. Eng. Phys.* **41**, 63–73  
553 (2017).
- 554 15. S. Jiang, B. Lv, W. Guo, C. Zhang, H. Wang, X. Sheng, P. B. Shull, Feasibility of Wrist-  
555 Worn, Real-Time Hand, and Surface Gesture Recognition via sEMG and IMU Sensing.  
556 *IEEE Trans. Ind. Informatics.* **14**, 3376–3385 (2018).
- 557 16. F. Botros, A. Phinyomark, E. Scheme, EMG-Based Gesture Recognition: Is It Time to  
558 Change Focus from the Forearm to the Wrist? *IEEE Trans. Ind. Informatics*, 1–1 (2020).
- 559 17. R. N. Khushaba, S. Kodagoda, M. Takruri, G. Dissanayake, Toward improved control of  
560 prosthetic fingers using surface electromyogram (EMG) signals. *Expert Syst. Appl.* **39**,  
561 10731–10738 (2012).
- 562 18. C. Cipriani, C. Antfolk, M. Controzzi, G. Lundborg, B. Rosen, M. C. Carrozza, F.  
563 Sebelius, Online myoelectric control of a dexterous hand prosthesis by transradial  
564 amputees. *IEEE Trans. Neural Syst. Rehabil. Eng.* **19**, 260–270 (2011).
- 565 19. A. Holobar, D. Zazula, Multichannel blind source separation using convolution Kernel  
566 compensation. *IEEE Trans. Signal Process.* **55**, 4487–4496 (2007).
- 567 20. V. Glaser, A. Holobar, D. Zazula, Real-time motor unit identification from high-density  
568 surface EMG. *IEEE Trans. Neural Syst. Rehabil. Eng.* **21**, 949–958 (2013).
- 569 21. M. Chen, P. Zhou, A Novel Framework Based on FastICA for High Density Surface EMG

- 570 Decomposition. *IEEE Trans. Neural Syst. Rehabil. Eng.* **24**, 117–127 (2016).
- 571 22. F. Negro, S. Muceli, A. M. Castronovo, A. Holobar, D. Farina, Multi-channel  
572 intramuscular and surface EMG decomposition by convolutive blind source separation. *J.*  
573 *Neural Eng.* **13**, 026027 (2016).
- 574 23. D. Y. Barsakcioglu, M. Bracklein, A. Holobar, D. Farina, Control of Spinal Motoneurons  
575 by Feedback from a Non-invasive Real-Time Interface. *IEEE Trans. Biomed. Eng.*, 1–1  
576 (2020).
- 577 24. D. Farina, F. Negro, M. Gazzoni, R. M. Enoka, Detecting the Unique Representation of  
578 Motor-Unit Action Potentials in the Surface Electromyogram. *J. Neurophysiol.* **100**,  
579 1223–1233 (2008).
- 580 25. J. Rodríguez Falces, A. M. Trigueros, L. G. Useros, I. Rodríguez Carreño, J. Navallas  
581 Irujo, A mathematical analysis of SFAP convolutional models. *IEEE Trans. Biomed. Eng.*  
582 **52**, 769–783 (2005).
- 583 26. J. Rodriguez-Falces, N. Place, Effects of muscle fibre shortening on the characteristics of  
584 surface motor unit potentials. *Med. Biol. Eng. Comput.* **52**, 95–107 (2014).
- 585 27. D. Farina, C. Cescon, R. Merletti, Influence of anatomical, physical, and detection-system  
586 parameters on surface EMG. *Biol. Cybern.* **86**, 445–456 (2002).
- 587 28. N. A. Dimitrova, G. V. Dimitrov, O. A. Nikitin, Neither high-pass filtering nor  
588 mathematical differentiation of the EMG signals can considerably reduce cross-talk. *J.*  
589 *Electromyogr. Kinesiol.* **12**, 235–246 (2002).
- 590 29. C. J. Heckman, R. M. Enoka, in *Comprehensive Physiology* (John Wiley & Sons, Inc.,  
591 Hoboken, NJ, USA, 2012; <http://doi.wiley.com/10.1002/cphy.c100087>), vol. 2, pp. 2629–  
592 2682.
- 593 30. R. Merletti, A. Botter, U. Barone, in *Surface Electromyography : Physiology,*  
594 *Engineering, and Applications* (John Wiley & Sons, Inc., Hoboken, New Jersey, 2016;  
595 <http://doi.wiley.com/10.1002/9781119082934.ch03>), pp. 1–37.
- 596 31. G. L. Cerone, A. Botter, M. Gazzoni, A modular, smart, and wearable system for high  
597 density sEMG detection. *IEEE Trans. Neural Syst. Rehabil. Eng.* **66**, 3371–3380 (2019).
- 598 32. R. Q. Quiroga, Z. Nadasdy, Y. Ben-Shaul, Unsupervised spike detection and sorting with  
599 wavelets and superparamagnetic clustering. *Neural Comput.* **16**, 1661–1687 (2004).
- 600 33. A. Holobar, M. A. Minetto, D. Farina, Accurate identification of motor unit discharge  
601 patterns from high-density surface EMG and validation with a novel signal-based  
602 performance metric. *J. Neural Eng.* **11**, 016008 (2014).
- 603 34. S. Tanzarella, S. Muceli, A. Del Vecchio, A. Casolo, D. Farina, in *Proceedings of the*  
604 *Annual International Conference of the IEEE Engineering in Medicine and Biology*  
605 *Society, EMBS* (Institute of Electrical and Electronics Engineers Inc., 2019), pp. 2307–  
606 2310.
- 607 35. C. Chen, G. Chai, W. Guo, X. Sheng, D. Farina, X. Zhu, Prediction of finger kinematics  
608 from discharge timings of motor units: implications for intuitive control of myoelectric  
609 prostheses Recent citations. *J. Neural Eng.* **16**, 12 (2019).
- 610 36. C. Chen, S. Ma, X. Sheng, D. Farina, X. Zhu, Adaptive real-time identification of motor  
611 unit discharges from non-stationary high-density surface electromyographic signals. *IEEE*  
612 *Trans. Biomed. Eng.*, 1–1 (2020).
- 613 37. C. Chen, Y. Yu, S. Ma, X. Sheng, C. Lin, D. Farina, X. Zhu, Hand gesture recognition  
614 based on motor unit spike trains decoded from high-density electromyography. *Biomed.*  
615 *Signal Process. Control.* **55** (2019), doi:10.1016/j.bspc.2019.101637.

- 616 38. A. W. Monster, H. Chan, “Isometric Force Production by Motor Units of Extensor  
617 Digitorum Communis Muscle in Man” (1977), (available at  
618 [www.physiology.org/journal/jn](http://www.physiology.org/journal/jn)).
- 619 39. S. Andreassen, A. Rosenfalck, Regulation of the firing pattern of single motor units. *J*  
620 *Neurol Neurosurg Psychiatry*. **43**, 897–906 (1980).
- 621 40. A. Holobar, M. A. Minetto, A. Botter, F. Negro, D. Farina, Experimental Analysis of  
622 Accuracy in the Identification of Motor Unit Spike Trains From High-Density Surface  
623 EMG. *IEEE Trans. Neural Syst. Rehabil. Eng.* **18**, 221–229 (2010).
- 624 41. M. Stachaczyk, S. F. Atashzar, D. Farina, Adaptive Spatial Filtering of High-Density  
625 EMG for Reducing the Influence of Noise and Artefacts in Myoelectric Control. *IEEE*  
626 *Trans. Neural Syst. Rehabil. Eng.*, 1–1 (2020).
- 627 42. M. Stachaczyk, S. Farokh Ataszhar, S. Dupan, I. Vujaklija, D. Farina, Towards Universal  
628 Neural Interfaces for Daily Use: Decoding the Neural Drive to Muscles Generalises  
629 Highly Accurate Finger Task Identification Across Humans. *IEEE Access*, 1–1 (2020).
- 630 43. L. Mesin, A. K. Reddy Kandoor, R. Merletti, Separation of propagating and non  
631 propagating components in surface EMG. *Biomed. Signal Process. Control*. **3**, 126–137  
632 (2008).
- 633 44. C. Dai, X. Hu, Extracting and Classifying Spatial Muscle Activation Patterns in Forearm  
634 Flexor Muscles Using High-Density Electromyogram Recordings. *Int. J. Neural Syst.* **11**,  
635 1850025 (2018).
- 636 45. C. Dai, X. Hu, Finger Joint Angle Estimation Based on Motoneuron Discharge Activities.  
637 *IEEE J. Biomed. Heal. Informatics*. **24**, 760–767 (2020).
- 638 46. E. Campbell, A. Phinyomark, E. Scheme, Current trends and confounding factors in  
639 myoelectric control: Limb position and contraction intensity. *Sensors (Switzerland)*. **20**,  
640 1613 (2020).
- 641 47. A. Phinyomark, E. Campbell, E. Scheme, (Springer, Singapore, 2020;  
642 [https://doi.org/10.1007/978-981-13-9097-5\\_1](https://doi.org/10.1007/978-981-13-9097-5_1)), pp. 3–29.
- 643 48. N. A. Dimitrova, G. V. Dimitrov, O. A. Nikitin, Neither high-pass filtering nor  
644 mathematical differentiation of the EMG signals can considerably reduce cross-talk. *J.*  
645 *Electromyogr. Kinesiol.* **12**, 235–246 (2002).
- 646 49. T. Kapelner, F. Negro, O. C. Aszmann, D. Farina, Decoding Motor Unit Activity From  
647 Forearm Muscles: Perspectives for Myoelectric Control. *IEEE Trans. NEURAL Syst.*  
648 *Rehabil. Eng.* **26** (2018), doi:10.1109/TNSRE.2017.2766360.
- 649 50. A. Hyvärinen, E. Oja, A Fast Fixed-Point Algorithm for Independent Component  
650 Analysis. *Neural Comput.* **9**, 1483–1492 (1997).
- 651 51. J. Thomas, Y. Deville, S. Hosseini, Time-domain fast fixed-point algorithms for  
652 convolutive ICA. *IEEE Signal Process. Lett.* **13**, 228–231 (2006).
- 653 52. A. Del Vecchio, A. Holobar, D. Falla, F. Felici, R. M. Enoka, D. Farina, Tutorial:  
654 Analysis of motor unit discharge characteristics from high-density surface EMG signals.  
655 *J. Electromyogr. Kinesiol.* **53**, 102426 (2020).
- 656 53. K. G. Keenan, D. Farina, R. Merletti, R. M. Enoka, Amplitude cancellation reduces the  
657 size of motor unit potentials averaged from the surface EMG. *J Appl Physiol.* **100**, 1928–  
658 1937 (2006).
- 659 54. A. Phinyomark, P. Phukpattaranont, C. Limsakul, Feature reduction and selection for  
660 EMG signal classification. *Expert Syst. Appl.* **39**, 7420–7431 (2012).
- 661 55. O. W. Samuel, M. G. Asogbon, Y. Geng, A. H. Al-Timemy, S. Pirbhulal, N. Ji, S. Chen,

- 662 P. Fang, G. Li, Intelligent EMG Pattern Recognition Control Method for Upper-Limb  
663 Multifunctional Prostheses: Advances, Current Challenges, and Future Prospects. *IEEE*  
664 *Access*. 7, 10150–10165 (2019).  
665 56. M. Ariyanto, W. Caesarendra, K. A. Mustaqim, M. Irfan, J. A. Pakpahan, J. D. Setiawan,  
666 A. R. Winoto, in *Proceedings of the 2015 International Conference on Automation,*  
667 *Cognitive Science, Optics, Micro Electro-Mechanical System, and Information*  
668 *Technology, ICACOMIT 2015* (Institute of Electrical and Electronics Engineers Inc.,  
669 2016), pp. 12–17.

670

## 671 ACKNOWLEDGMENTS

672

### 673 **Funding:**

674 Engineering and Physical Sciences Research Council, Centre for Doctoral Training in

675 Neurotechnology for Life and Health (I.M.)

676 Facebook (I.M, D.Z.W)

677 Academy of Finland, project “Hi-Fi BiNDing”, no. 333149 (I.V.)

678 European Research Council, Synergy grant, project Natural BionicS, no. 810346 (D.Y.B., D.F.)

679

### 680 **Author contributions:**

681 All authors conceived the study

682 I.M. performed the data acquisition.

683 I.M. conducted the analysis.

684 All authors interpreted the data.

685 All authors wrote and edited the manuscript

686

687 **Competing interests:** D.Z.W. is a Research Scientist at Facebook Reality Labs with salary and  
688 equity compensation from Facebook. D.F. is Scientific Advisor for Facebook Reality Labs with  
689 compensation for this service from Facebook. D.Y.B and D.F. are inventors in a patent (Neural  
690 Interface. UK Patent application no. GB1813762.0. August 23, 2018) and patent application  
691 (Neural interface. UK Patent application no. GB2014671.8. September 17, 2020) related to the  
692 methods and applications of this work.

693

694 **Data and materials availability:** All data are available in the main text or the supplementary  
695 materials.

696

697



698 **FIGURES AND TABLES**  
699

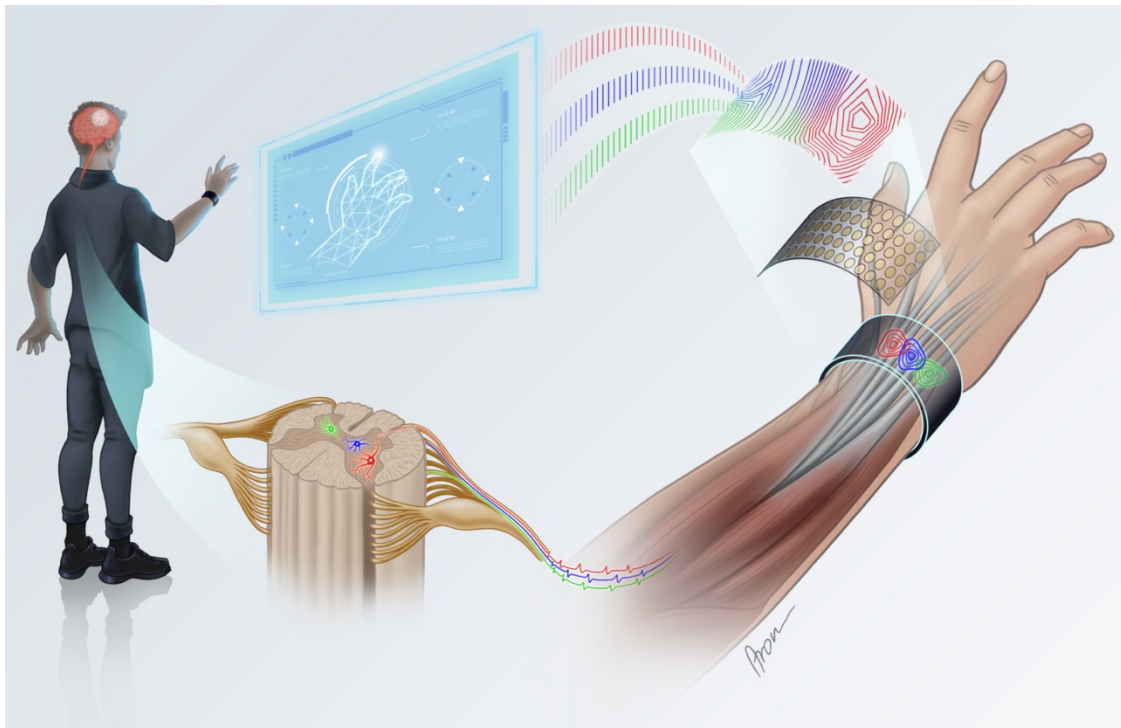

**Fig. 1. Interfacing motoneurons in the spinal cord non-invasively from the wrist via volume conduction and tendon potentials.** Motoneurons in the spinal cord translate the synaptic inputs they receive from supraspinal centres and peripheral afferents into a neural output sent to the muscles. When excited, they discharge axonal action potentials that reach the neuromuscular junction of the innervated muscle fibers. The associated electric fields can be detected at the tendon endings of the wrist using electrodes (in this case, arranged in a wrist-band) due to volume conduction. However, the obtained tendon electric signals experience a high crosstalk between each other due to the convergence of multiple tendons in the reduced space of the wrist. To enhance the information transfer needed for precise decoding of motor volition, the generative model of the recorded potentials can theoretically be reversed to estimate the activity of the spinal motoneurons as long as the induced electric fields at the tendons are unique for each motoneuron.

700

701

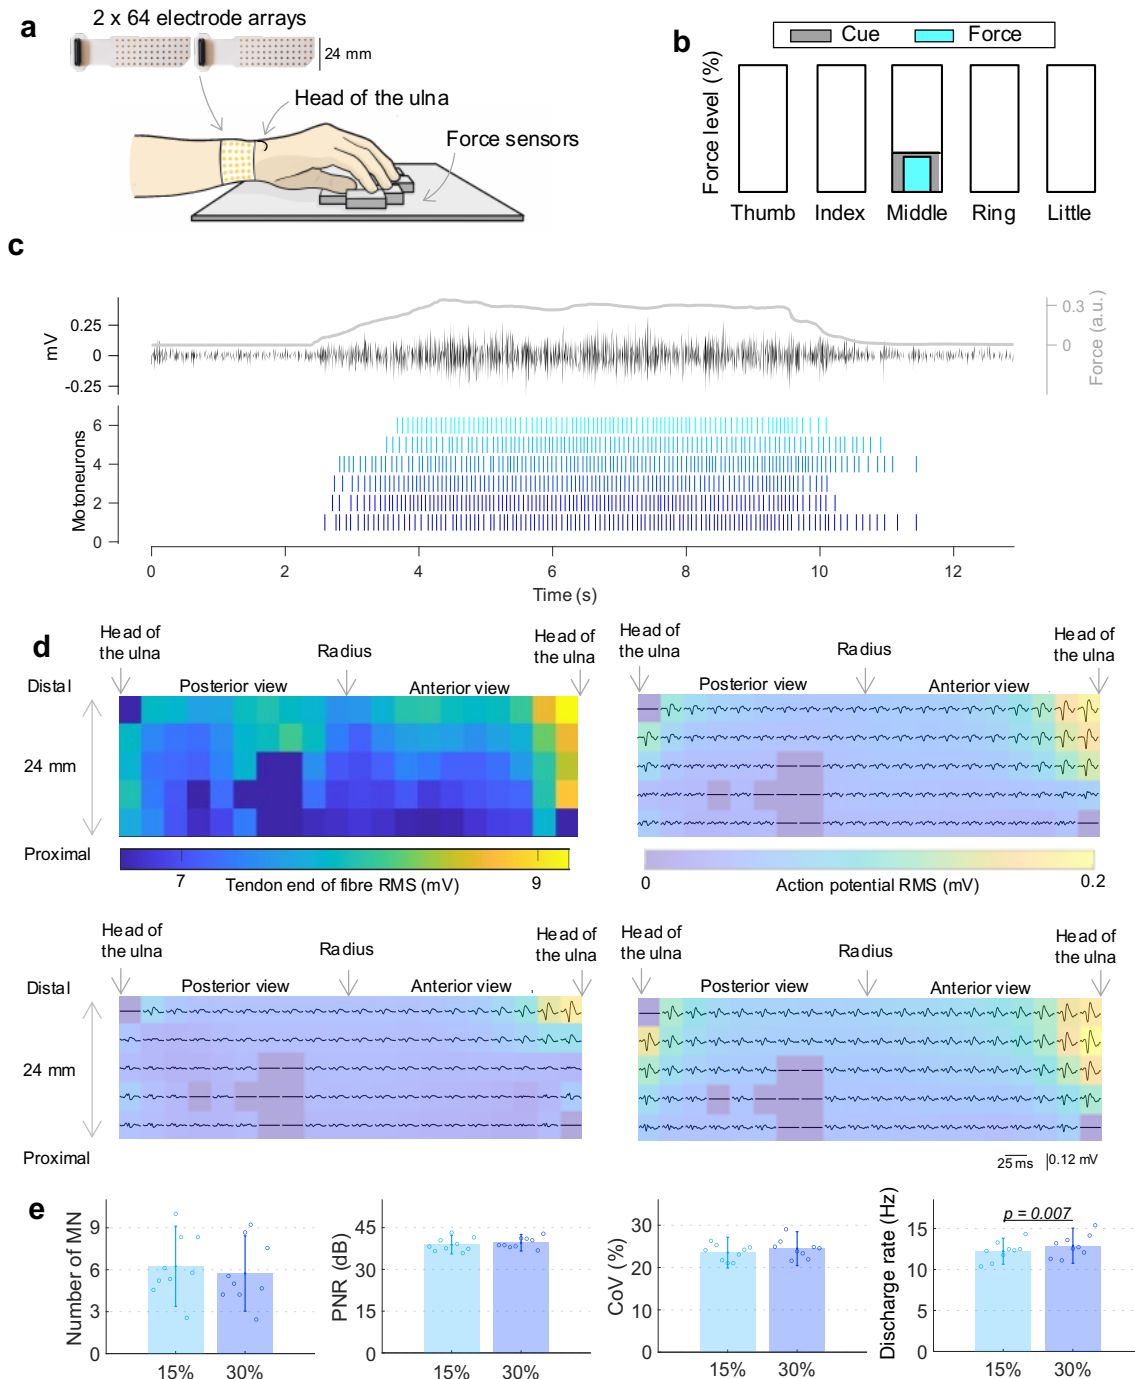

**Fig. 2. Decoded tendon electric signals from the wrist interface.** (A) Experimental setup for the concurrent acquisition of the tendon electric signals and individual finger flexion forces. (B) Participant’s visual feedback with the contraction cues in grey and the exerted forces in blue. (C) A representative contraction from one participant with the force profile in grey, one tendon electrical signal from the tendons in black, and the decomposed spike trains (decoded tendon electrical signals). (D) (top left) 2D spatial distribution of the root mean square (RMS) of each channel of the tendon electrical signals from one representative contraction, (top right and bottom) three examples of the reconstructed action potentials of three decoded motoneurons from the same contraction after spike-triggered averaging along with their corresponding RMS spatial maps. The channels in dark blue were discarded due to noise interference. (E) Physiological analysis of the decoded tendon electrical signals from the wrist for 15% (light blue) and 30% (dark blue) force efforts in terms of the number of detected motoneurons (MN), pulse-to-noise ratio (PNR), coefficient of variation (CoV) of the inter spike intervals, and motoneuron discharge rate averaged across finger movements and subjects. The results indicate that the decoded tendon electrical signals from the wrist are accurate (PNR > 30 dB and CoV < 30%) and comply with motoneuron’s physiological behaviour (DR between 5-25Hz). The reported significance levels are based on two-way repeated measures ANOVA.

702

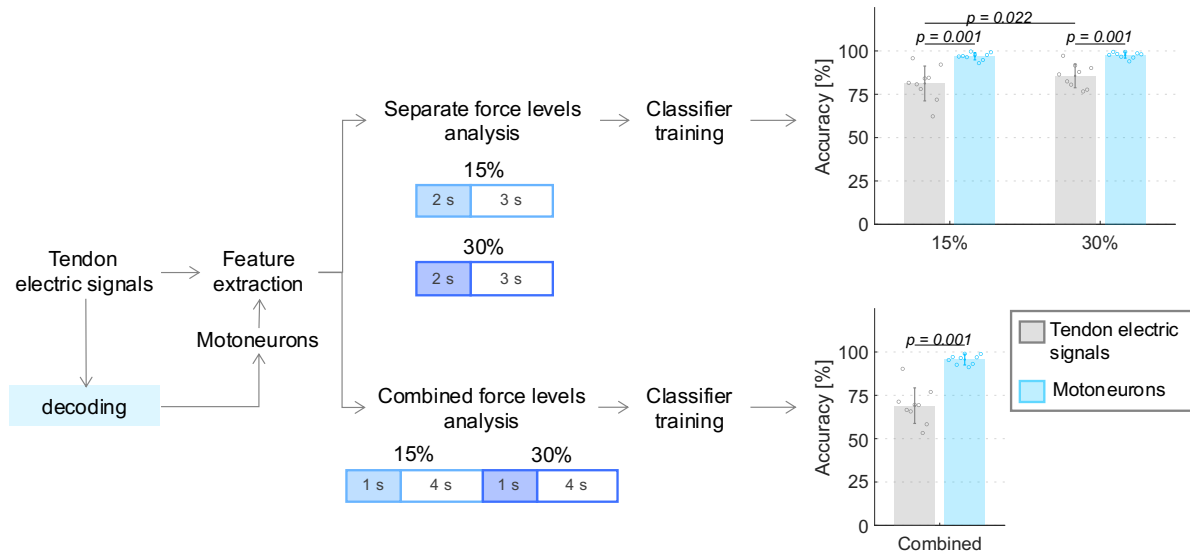

**Fig. 3. Offline classification performance.** Processing steps for the tendon electrical signals and decoded motoneurons from the wrist for the separate and combined force level analyses for finger prediction. The blocks represent the steady contraction part of the signals with the training and testing portions in blue and white, respectively. The obtained classification accuracies show that the decoded motoneuron activity (in blue) is a better predictor of underlying finger flexion than the un-decoded tendon electric signals (in grey), with high accuracy, irrespective of the force level. Plot significances are based on repeated measures ANOVA.

703

704

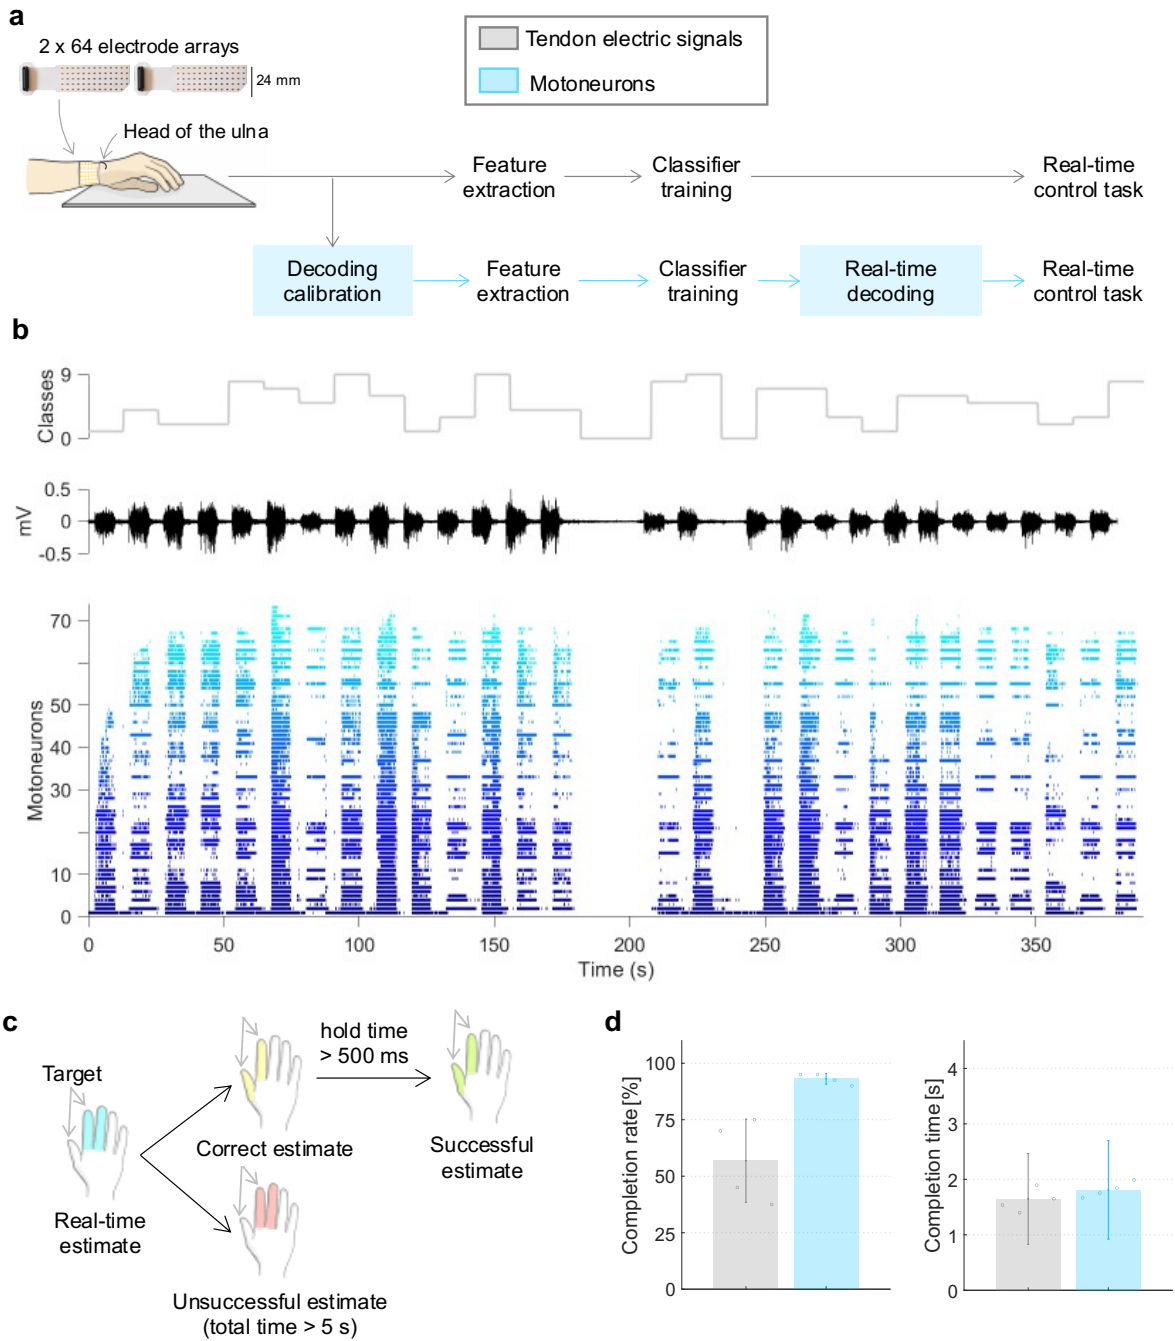

**Fig. 4. Real-time control.** (A) Acquisition setup for the online testing with the processing pipelines for the tendon electric signals (grey) and decoded motoneurons (blue). The additional steps specific of the decomposition algorithm are highlighted in blue. (B) Training set from one representative participant with the class cues on top (each individual finger plus all the combinations of thumb, index, and middle), one tendon electric signal in the middle, and the decoded motoneuron activity during the decomposition calibration at the bottom. (C) Success and fail conditions for the real-time control task (D) Online control performance for the tendon electric signals (grey) and decoded motoneurons (blue) in terms of completion rate and completion time.

705

706 SUPPLEMENTARY MATERIALS  
707

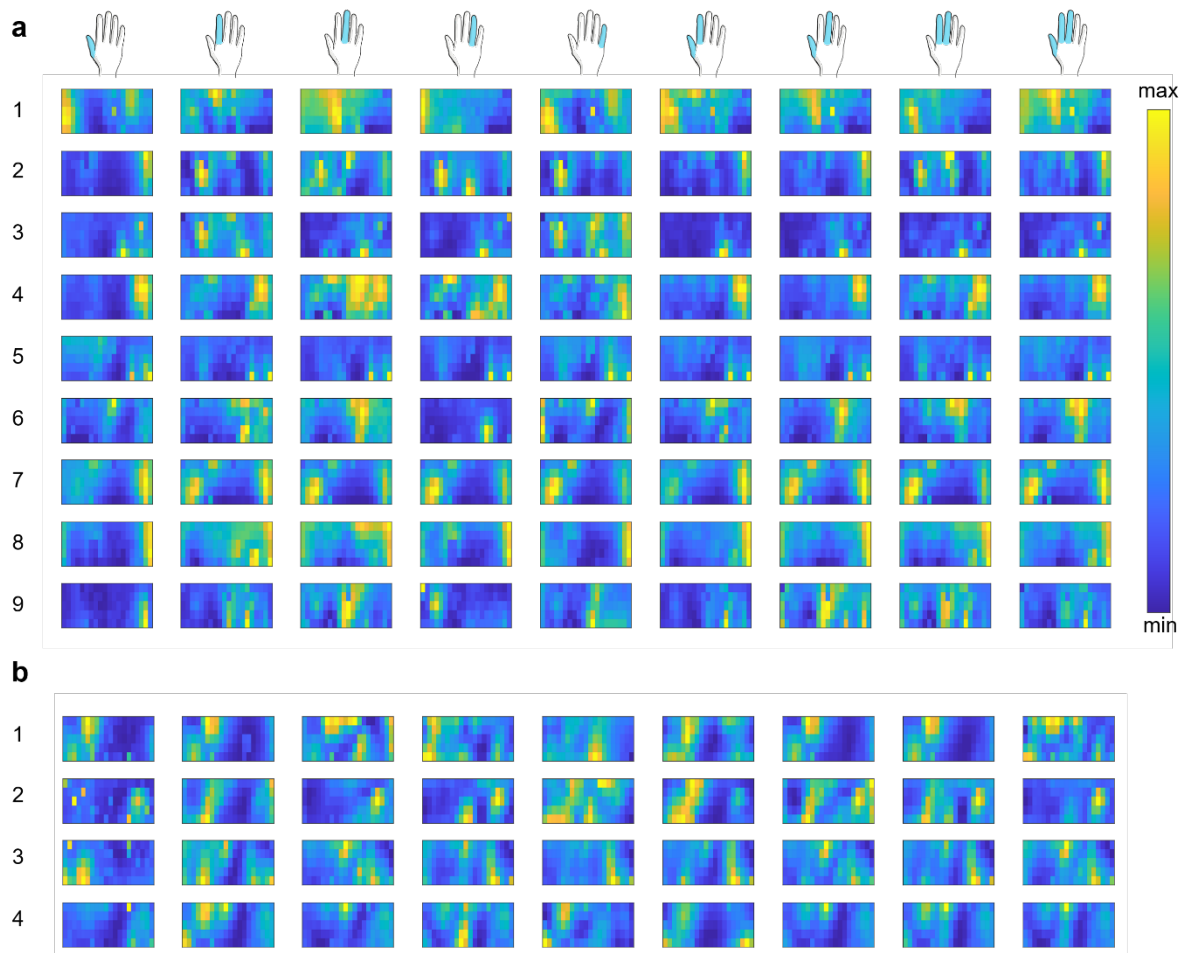

**Fig. S1. 2D spatial distribution of the normalized amplitude of the tendon electric signals.** Each subplot depicts the normalized root mean square of the tendon electric signals for each channel (pixel) in their corresponding spatial distribution in the electrode array at the wrist (view: bottom = proximal, top = distal, left = ulna posterior, right = ulna anterior). The values for few discarded channels due to noise have been estimated by 2D linear interpolation. The figure shows a high overlap in the activity area of the different finger contractions (columns) within each subject (rows). **(A)** mean across the maps at 15% and 30% of force efforts from the offline dataset. **(B)** mean across the maps of the three repetitions of the training set for the online prediction task.

708

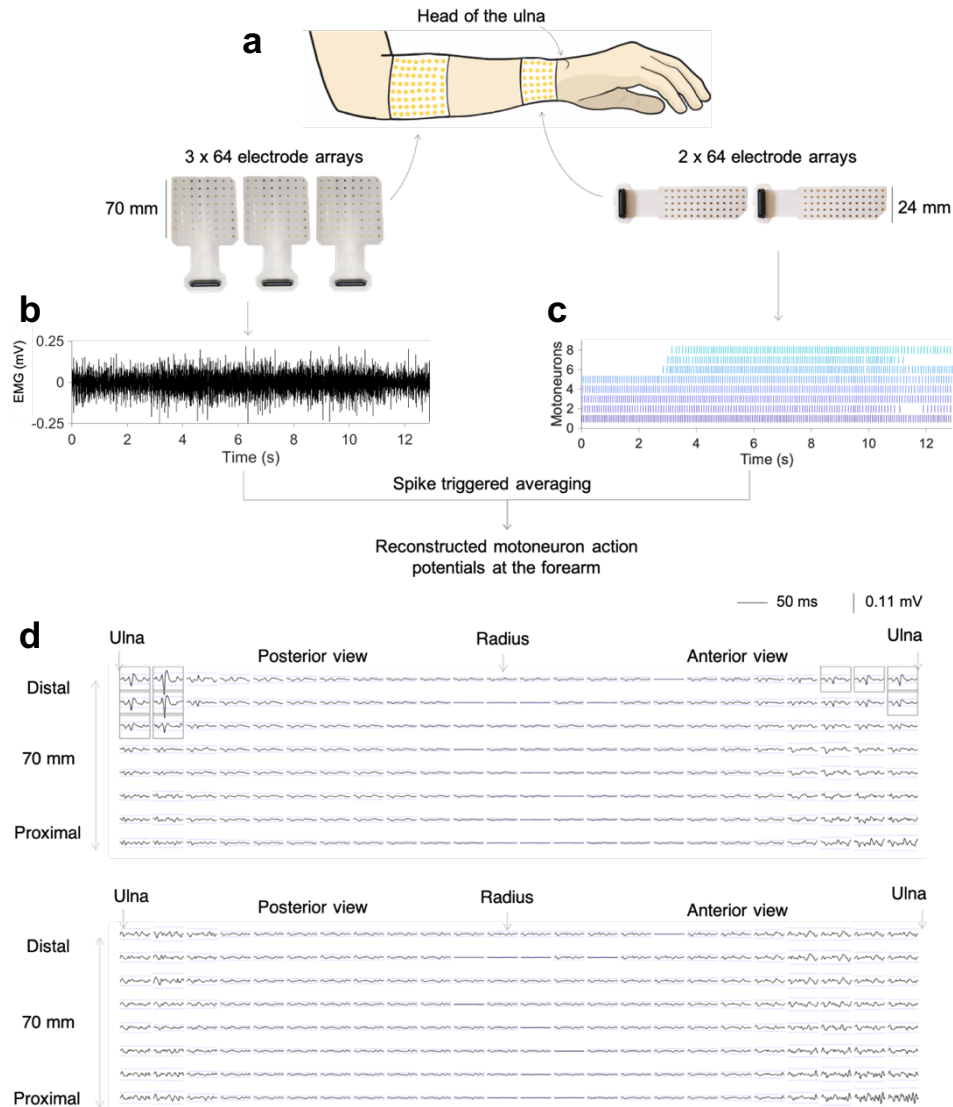

**Fig. S2. Retracing motoneuron fiber action potentials at the forearm from the discharge timings decoded at the wrist.** (A) Acquisition setup for concurrent recording of electromyogram (EMG) signals at the forearm and tendon electric signals at the wrist. (B) Representative EMG signal from a single contraction at the forearm. (C) Decoded motoneuron discharge timings from the tendon electric signals at the wrist for the same contraction. (D) Two representative examples of reconstructed motoneuron fiber action potentials for each channel at the forearm after spike trigger averaging the EMG signals across 50 ms windows centered at the discharge timings of the motoneurons detected at the wrist. The rationale for this approach is that if the discharge times decoded at the wrist correspond to the times of activation of spinal motoneurons, then the triggered average should identify muscle fiber potentials at the forearm above the baseline noise. The detection threshold was set to four times the baseline noise which is depicted for each channel as blue dotted lines. The channels that met this condition are framed in grey. As shown in the first example, only the channels that corresponded to muscle fiber action potentials were selected. Simultaneously, the detection condition was not met in the second example despite the variable amplitude levels, as no channel exhibited the stereotypical action potential waveform. This analysis showed that 703 out of 970 motoneurons decoded from the wrist were retraceable to the forearm, which proves the neural origin of the decoded tendon electric signals.

710

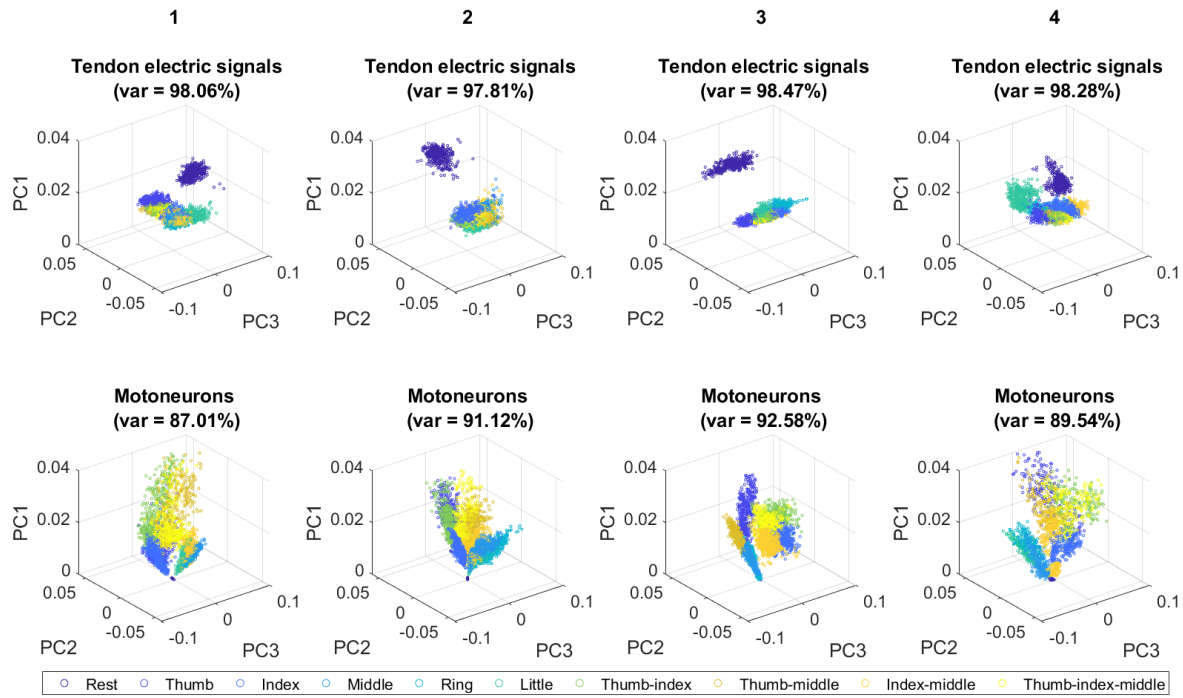

**Fig. S3. Feature space for the tendon electric signals and decoded motoneurons from the online task training.** Visualization of the features for the tendon electric signals (top) comprising the root mean square, slope sign changes, waveform length, and zero crossings for each channel, and the spike count of the decoded motoneurons (bottom) over the first three principal components with the total explained variance between brackets. Each column represents one participant and finger contractions are color coded. The figure shows higher separability between finger contractions in the motoneuron feature space than in the tendon electric signals one.

711

712
